# Supplementary material for: Dynamics of high-speed micro-drop impact: numerical simulations and experiments at frame-to-frame times below 100 ns
Source: Royal Society of Chemistry journal article supplement (doi:10.1039/c4sm02474e), 2014-12-16
Supplement: c4sm02474e1.pdf [file c4sm02474e1.pdf]

Supplementary material:

Dynamics of high-speed micro-droplet impact:  
numerical simulations and experiments at frame  
rates beyond  $10^7$  fps

Claas Willem Visser, Philipp Frommhold, Sander Wildeman,

Robert Mettin, Chao Sun, Detlef Lohse,

November 3, 2014

Table 1: Parameters for droplet impact movies. Their point in the phase diagram has been indicated in figure S1.

| File name | $D_0[\mu\text{m}]$ | $V_0 [\text{m/s}]$ | Re   | We   | Surface          | Bottom view |
|-----------|--------------------|--------------------|------|------|------------------|-------------|
| Mov1      | 45                 | 15                 | 696  | 150  | Superhydrophobic | No          |
| Mov2      | 50                 | 17                 | 836  | 196  | Glass            | Yes         |
| Mov3      | 49                 | 16                 | 803  | 183  | Glass            | No          |
| Mov4      | 49                 | 16                 | 803  | 183  | RainX            | No          |
| Mov5      | 47                 | 26                 | 1231 | 449  | Glass            | No          |
| Mov6      | 47                 | 26                 | 1237 | 453  | RainX            | No          |
| Mov7      | 47                 | 49                 | 2286 | 1559 | Glass            | No          |
| Mov8      | 47                 | 49                 | 2283 | 1550 | RainX            | No          |

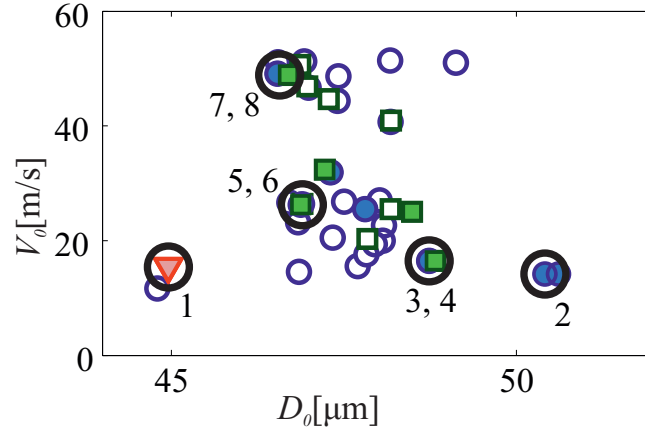

Figure S1: Overview of the phase space of droplet impact: velocity versus diameter.

Movies are labeled with a number, corresponding to table 1
